# Supplementary material for: A stable hybrid catalyst (POM-PPPh3/L/Ni) for the reduction of toxic nitroarene compounds in water
Source: Royal Society of Chemistry journal article supplement (doi:10.1039/d4dt00909f), 2024-01-01
Supplement: d4dt00909f1.pdf [file d4dt00909f1.pdf]

## Supporting Information

### Stable hybrid catalyst (POM-PPPh<sub>3</sub>/L/Ni) for reduction of toxic nitroarene compounds in water

**Shima Aghajani**<sup>a</sup>, **Maryam Mohammadikish**<sup>a, b\*</sup>

<sup>a</sup> Department of Inorganic Chemistry, Faculty of Chemistry, Kharazmi University, 15719-14911, Tehran, Iran

<sup>b</sup> Research Institute of Green Chemistry, Kharazmi University, Tehran, Iran

Tel./fax: +98 2186072706.

E-mail address: mohammadikish@khu.ac.ir

## Experimental

### Materials and Methods

Nickel (II) acetate tetrahydrate, molybdenum trioxide, phosphoric acid, nitric acid, (3-bromopropyl)triphenylphosphonium bromide, diethylenetriamine, and salicylaldehyde were purchased from Sigma-Aldrich, Merck, or Fluka in analytical grade and used as received. Nitrobenzene, 1-bromo-4-nitrobenzene, 1-chloro-4-nitrobenzene, 1-fluoro-4-nitrobenzene, 1-chloro-3-nitrobenzene, 1-chloro-2-nitrobenzene, 4-nitrophenol (4-NP), 3-nitrophenol, 4-nitroacetophenone, 1,2-dinitrobenzene, 4-nitroanilin, 1-nitronaphthalen, 4-nitrobenzoicacid, 2-nitrobenzaldehyde, 1-methoxy-4-nitrobenzene, and 4-nitroacetophenone were purchased from Sigma-Aldrich and used without further purification.

Thermogravimetric analysis (TGA) of the samples was performed using a Netzsch-TGA 209 F1 thermogravimeter heated from 25 to 700 °C at a heating rate of 10 °C.min<sup>-1</sup> under static air. Fourier transform infrared (FT-IR) spectra from solid samples were carried on a Perkin-Elmer-RXI FT-IR spectrometer, using KBr disks. Inductively coupled plasma-optical emission spectrometry (ICP-OES) results for depicting the molar ratio of Mo and Ni were obtained on a SPECTRO ARCOS

analyzer. In order to investigate the crystal structure, the Powder X-ray diffraction (XRD) analyses were used on a Rigaku D-max CIII X-ray diffractometer with Cu K $\alpha$  radiation. Field emission scanning electron microscopy (FESEM) and elemental mapping analyses were executed in a high-resolution MIRA3-TSCAN microscope. X-ray photoelectron spectroscopy (XPS) was performed using a vacuum generator Thermo ESCALAB 250 XI with Mg X-ray sources. Transmission electron microscopy (TEM) images were carried out on the TEM Philips EM 208S (accelerating voltage:100 kV) instrument. The  $^1\text{H}$  NMR spectra of products were recorded on Bruker AMX 300 MHz NMR spectrometers using  $\text{CDCl}_3$  or  $\text{DMSO-d}_6$  as the solvent. The electronic absorption spectra (UV-visible) of the nitroarenes were carried out on a Perkin Elmer Lambda 25 UV-vis spectrophotometer in the wavelength range of 200-800 nm in a quartz cuvette. Gas chromatography-mass spectrometry (GC-MS) experiment was carried out with Agilent 7890A-MSD 5975 to specify the mechanism.

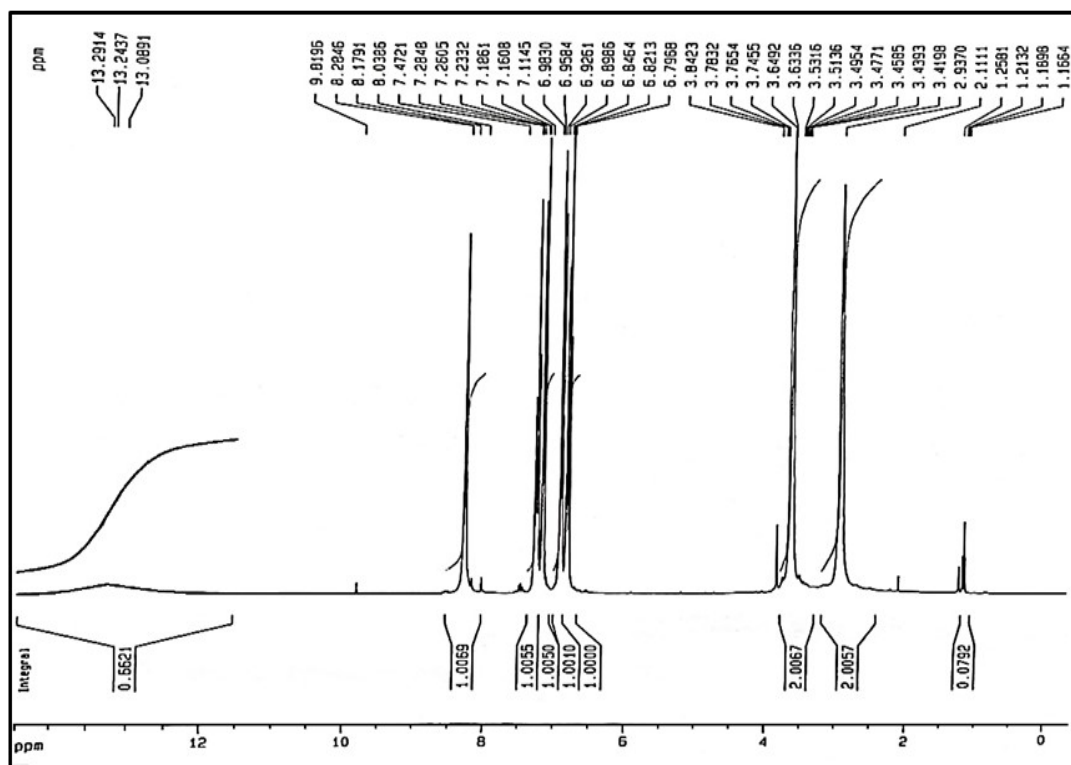

**Figure S1.**  $^1\text{H}$  NMR spectrum of the prepared Schiff base.

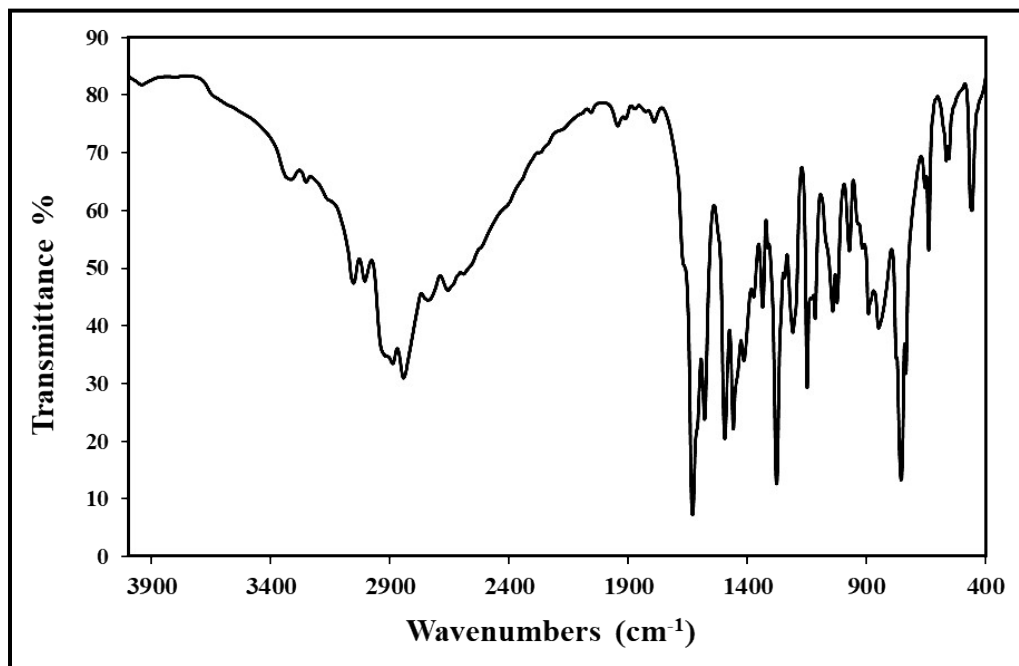

**Figure S2.** FT-IR spectrum of the prepared Schiff base.

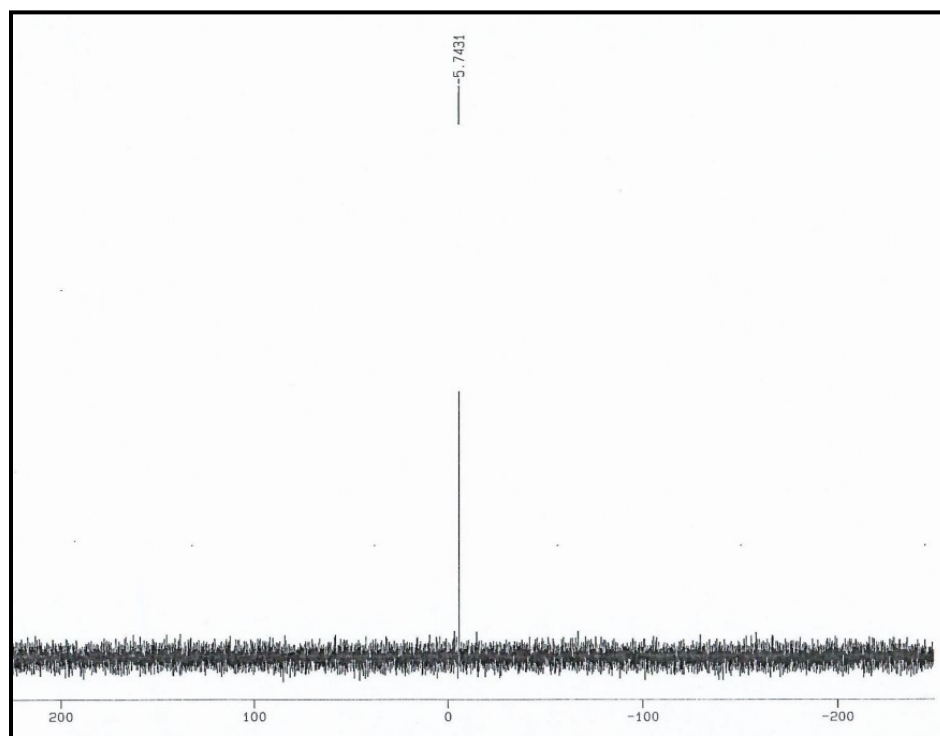

**Figure S3.** <sup>31</sup>P NMR spectrum of the POM.

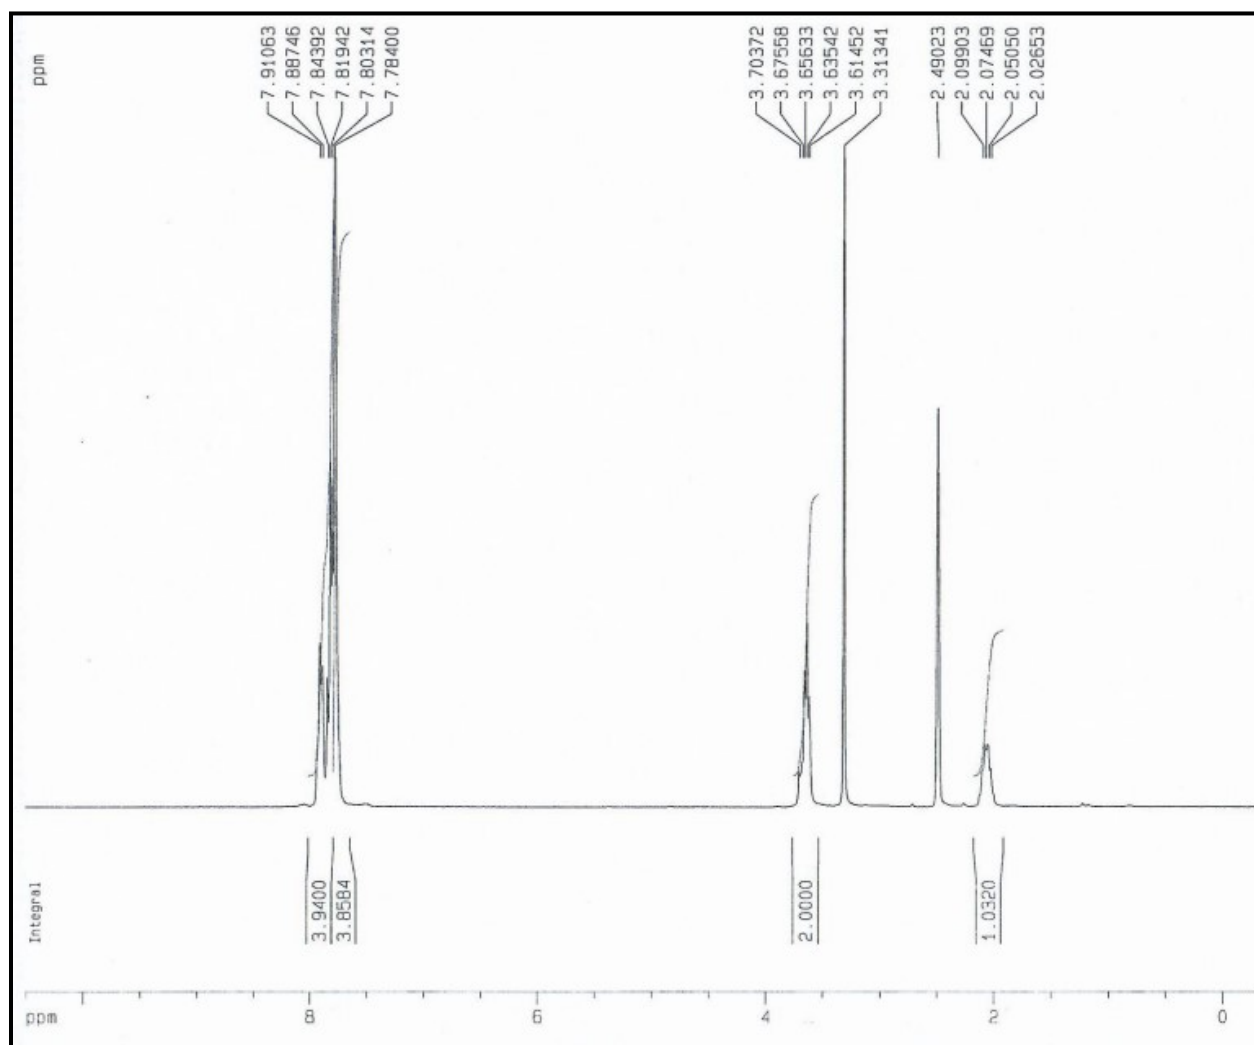

**Figure S4.** <sup>1</sup>H NMR spectrum of the prepared POM-PPPh<sub>3</sub>.

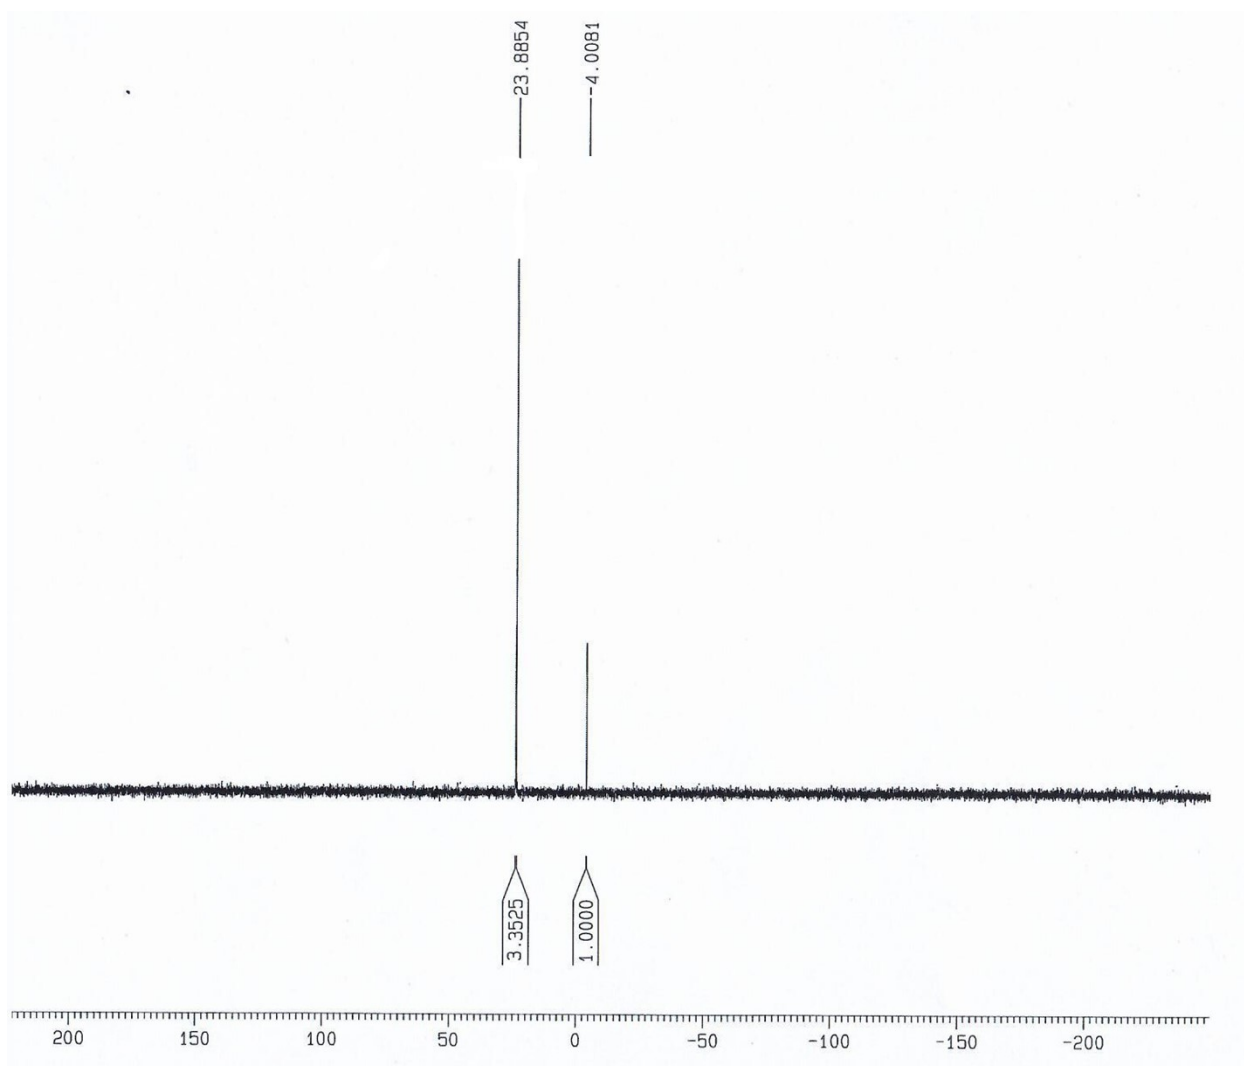

**Figure S5.**  $^{31}\text{P}$  NMR spectrum of the prepared POM-PPPh<sub>3</sub>.

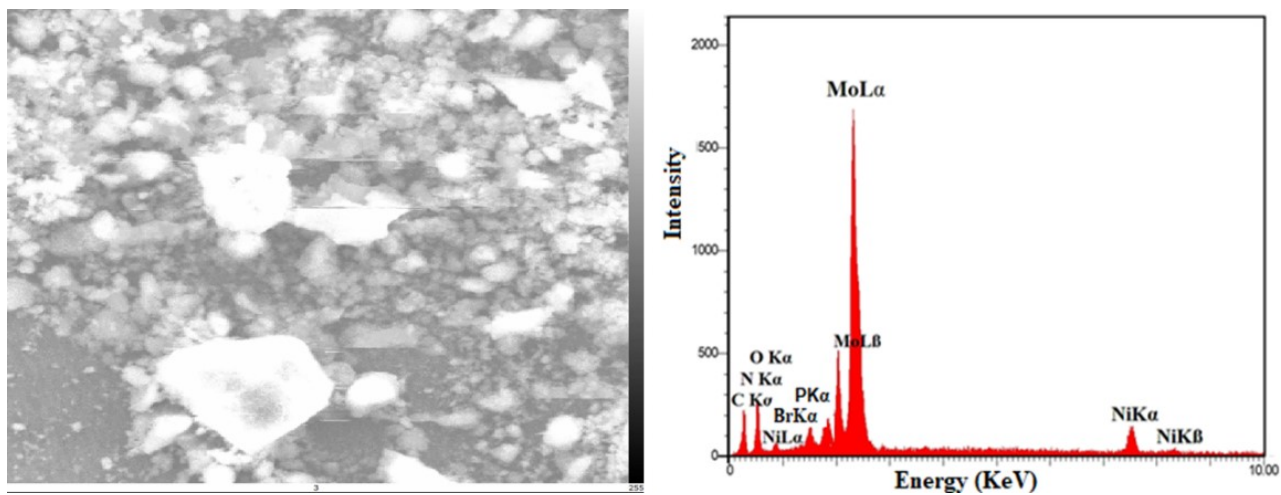

**Figure S6.** EDX spectrum of POM-PPPh<sub>3</sub>/L/Ni nanocatalyst.

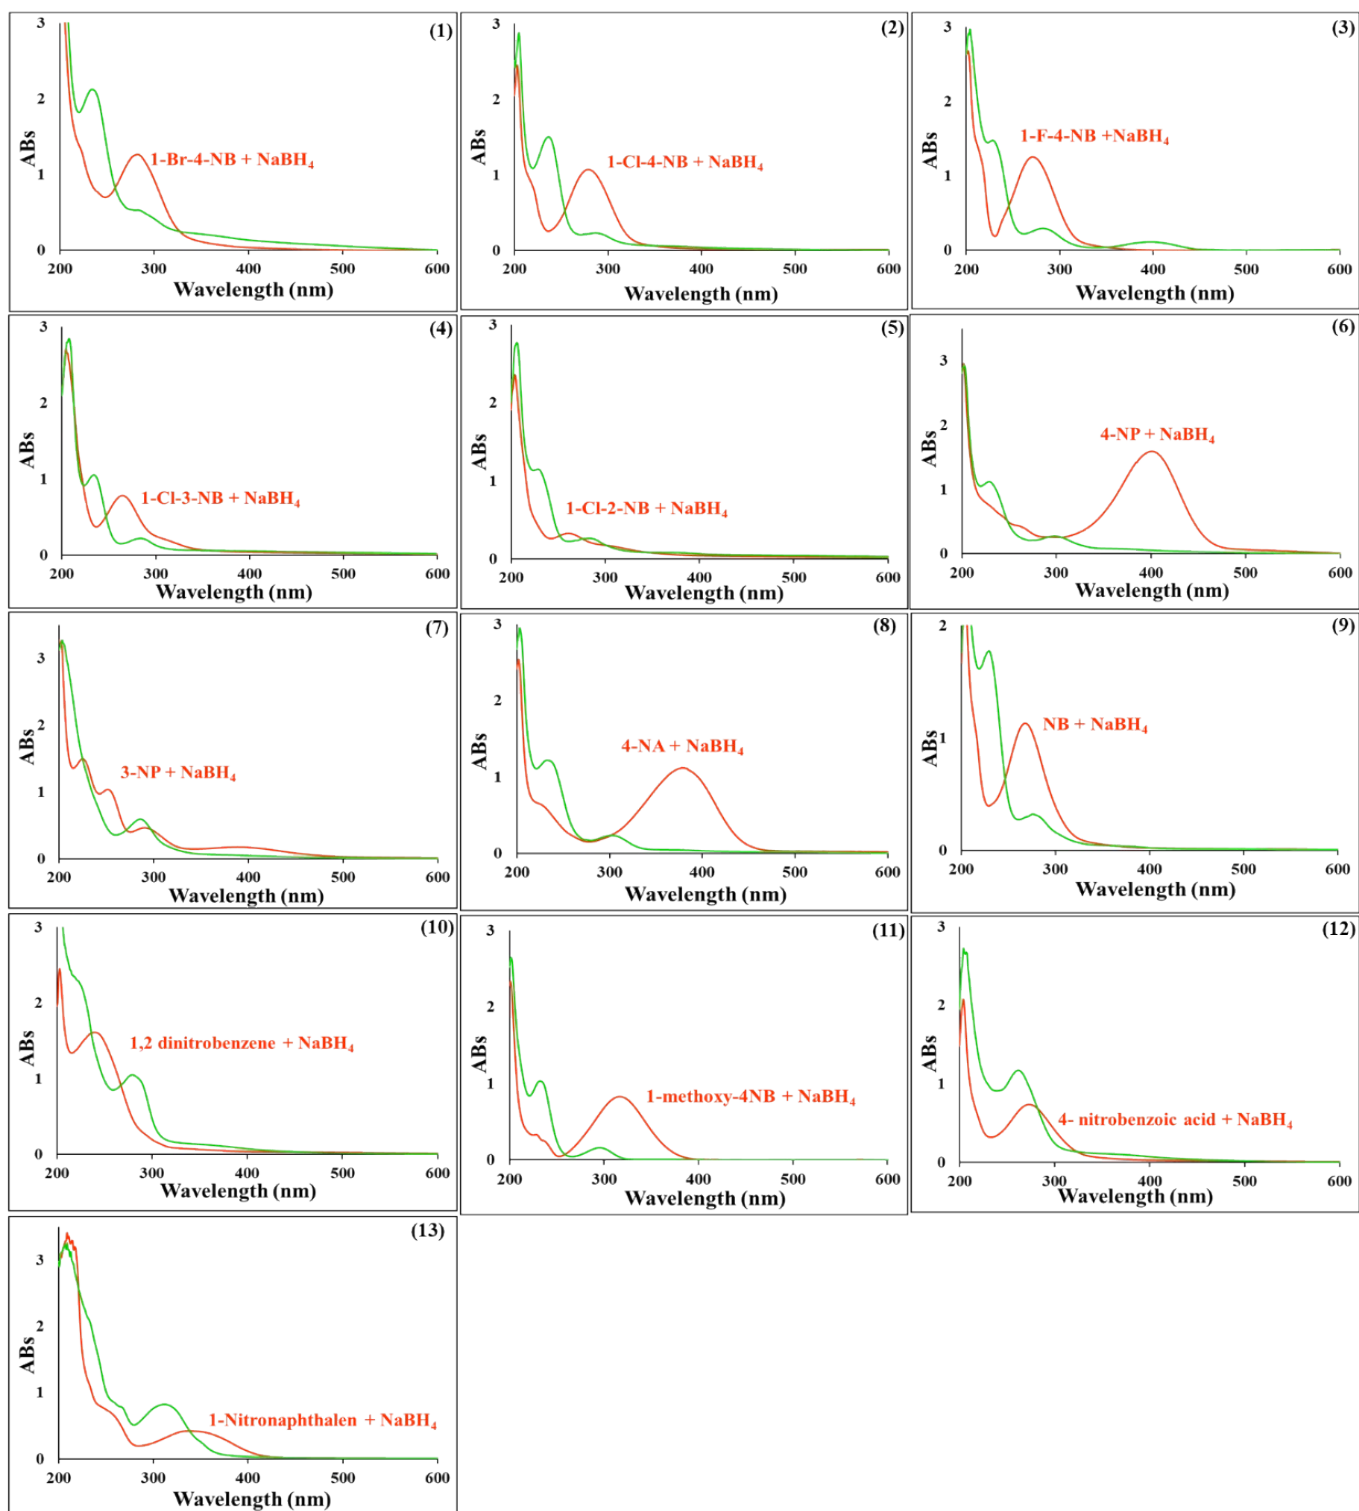

**Figure S7.** UV-Vis spectra of the reduction of various nitroaromatic compounds to the corresponding aminoarenes in the presence of POM-PPPh<sub>3</sub>/L/Ni nanocatalyst (Orange lines: before the addition of catalyst, Green lines: at the end of the reaction).

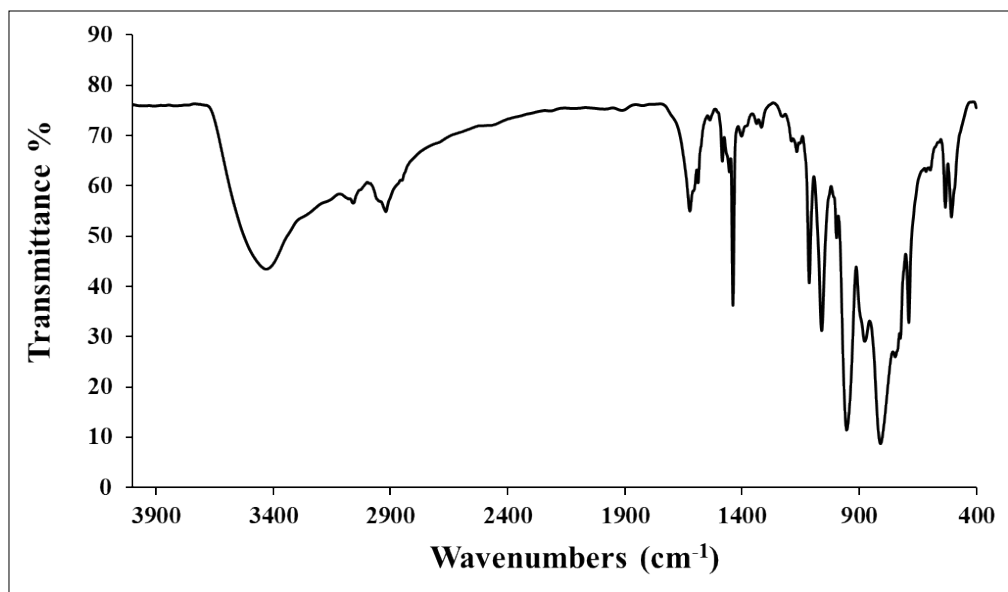

**Figure S8.** FT-IR spectrum of POM-PPPh<sub>3</sub>/L/Ni nanocatalyst after the recyclability test.

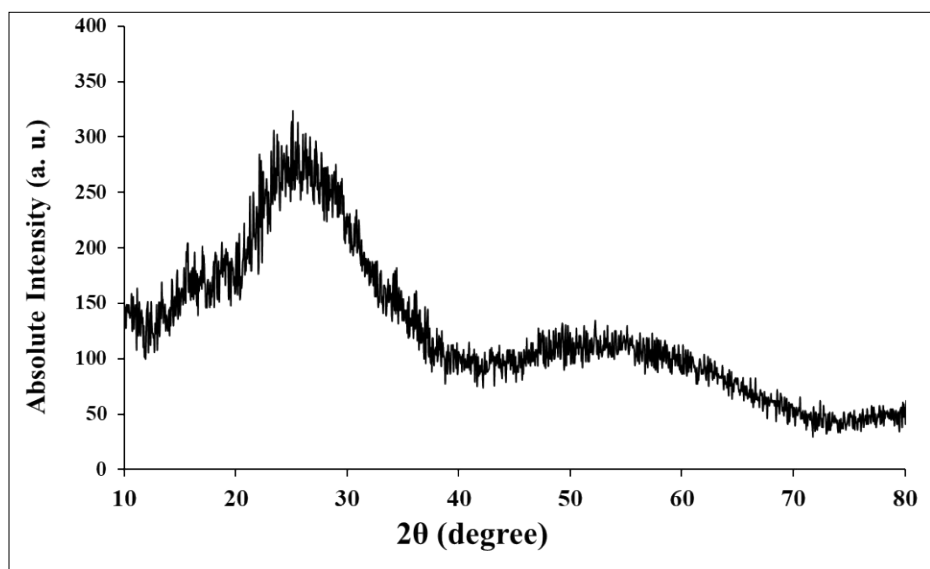

**Figure S9.** XRD pattern of POM-PPPh<sub>3</sub>/L/Ni nanocatalyst after the recyclability test.



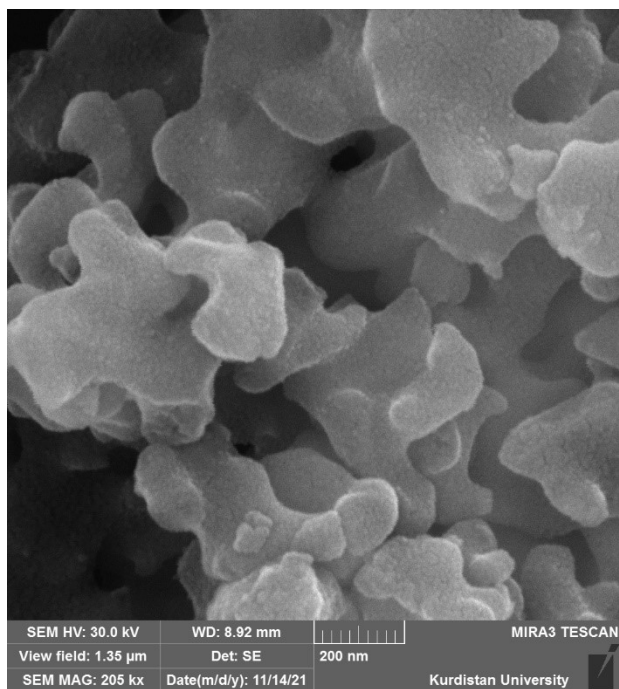

**Figure S10.** FESEM image of POM-PPPh<sub>3</sub>/L/Ni nanocatalyst after the recyclability test.

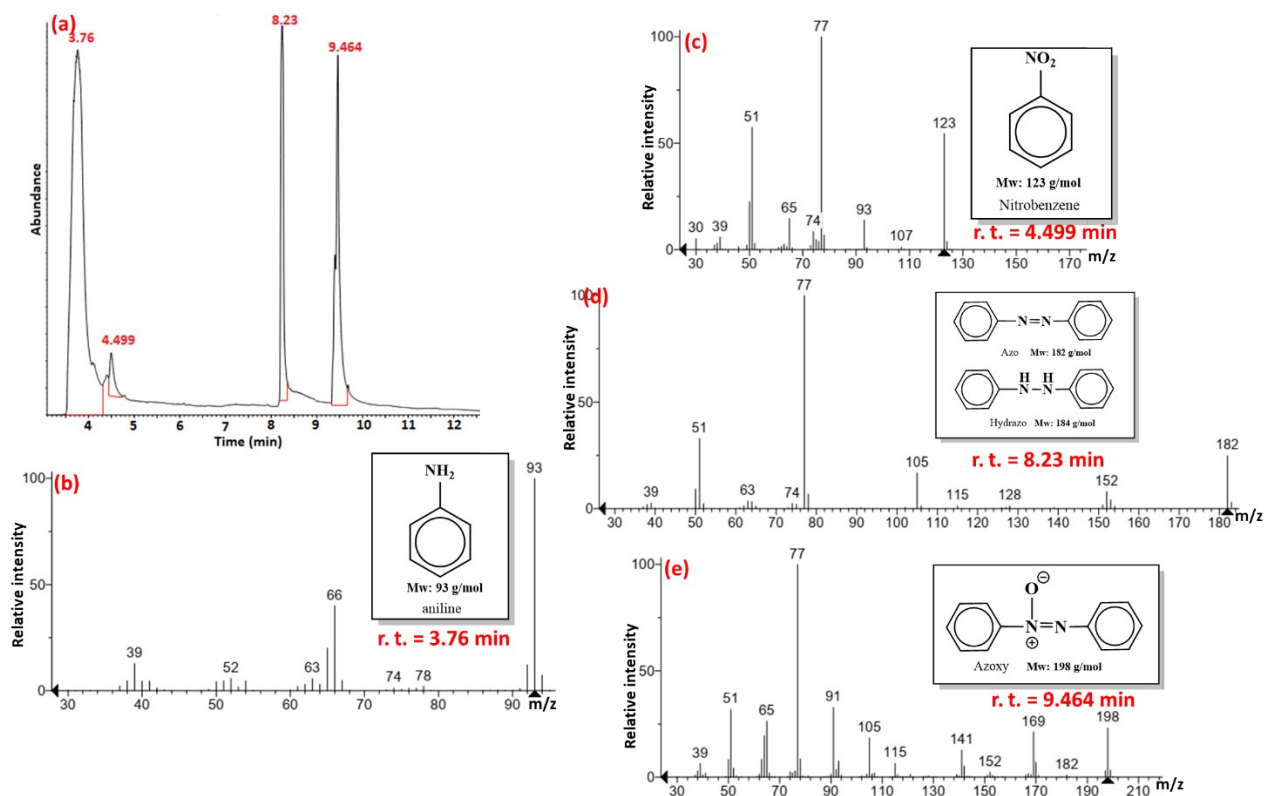

**Figure S11.** (a) GC and (b), (c), (d), and (e) the mass spectra of the products of NB reduction after 5 min in the presence of POM-PPPh<sub>3</sub>/L/Ni nanocatalyst.

**Table S1.** FT-IR data of the POM, POM-PPPh<sub>3</sub>, POM-PPPh<sub>3</sub>/L, and POM-PPPh<sub>3</sub>/L/Ni.

| Compounds             | Bonds                               | Frequency (cm <sup>-1</sup> ) |
|-----------------------|-------------------------------------|-------------------------------|
| POM                   | M-O <sub>b/c</sub> -M <sub>as</sub> | 780                           |
|                       | M-O <sub>b/c</sub> -M <sub>as</sub> | 870                           |
|                       | M=O <sub>stret</sub>                | 960                           |
|                       | P-O <sub>stret</sub>                | 1065                          |
| POM-PPPh <sub>3</sub> | M-O <sub>b/c</sub> -M <sub>as</sub> | 787                           |
|                       | M-O <sub>b/c</sub> -M <sub>as</sub> | 875                           |

|                                  |                                     |           |
|----------------------------------|-------------------------------------|-----------|
|                                  | M=O <sub>stret</sub>                | 957       |
|                                  | P-O <sub>stret</sub>                | 1070      |
|                                  | C-H <sub>oop</sub>                  | 650-1000  |
|                                  | P-CH <sub>2</sub>                   | 1438      |
|                                  | C=C                                 | 1400-1600 |
|                                  | C-H <sub>aliphatic</sub>            | 2895      |
|                                  | C-H <sub>aromatic</sub>             | 3050      |
|                                  | M-O <sub>b/c</sub> -M <sub>as</sub> | 778       |
|                                  | M-O <sub>b/c</sub> -M <sub>as</sub> | 875       |
|                                  | M=O <sub>stret</sub>                | 950       |
|                                  | P-O <sub>stret</sub>                | 1080      |
| <b>POM-PPPh<sub>3</sub>/L</b>    | C-H <sub>oop</sub>                  | 650-1000  |
|                                  | P-CH <sub>2</sub>                   | 1440      |
|                                  | C=C                                 | 1400-1600 |
|                                  | C=N                                 | 1629      |
|                                  | C-H <sub>aliphatic</sub>            | 2902      |
|                                  | C-H <sub>aromatic</sub>             | 3050      |
|                                  | M-O <sub>b/c</sub> -M <sub>as</sub> | 780       |
|                                  | M-O <sub>b/c</sub> -M <sub>as</sub> | 880       |
| <b>POM-PPPh<sub>3</sub>/L/Ni</b> | M=O <sub>stret</sub>                | 950       |
|                                  | P-O <sub>stret</sub>                | 1073      |
|                                  | C-H <sub>oop</sub>                  | 650-1000  |
|                                  | P-CH <sub>2</sub>                   | 1440      |

|                          |           |
|--------------------------|-----------|
| C=C                      | 1400-1600 |
| C=N                      | 1621      |
| C-H <sub>aliphatic</sub> | 2898      |
| C-H <sub>aromatic</sub>  | 3046      |

**Table S2.** XPS data of the Mo 3d at POM-PPPh<sub>3</sub>/L/Ni nanocatalyst.

| <b>Elements</b>      | <b>Binding Energy (eV)</b> |
|----------------------|----------------------------|
| Mo 3d <sub>5/2</sub> | 232.4, 232.6               |
| Mo 3d <sub>3/2</sub> | 235.6, 235.8               |
